# Supplementary material for: Tiagabine treatment in kainic acid induced cerebellar lesion of dystonia rat model
Source: PubMed Central journal article supplement (PMC5318686; doi:10.17179/excli2016-482), 2016-11-17
Supplement: EXCLI-15-716-s-001.pdf [file EXCLI-15-716-s-001.pdf]

**Supplementary material to:**

**TIAGABINE TREATMENT IN KAINIC ACID INDUCED  
CEREBELLAR LESION OF DYSTONIA RAT MODEL**

Tsui-chin Wang<sup>1</sup>, Sukonthar Ngampramuan<sup>2\*</sup>, Naiphinich Kotchabhakdi\*

Research Center for Neuroscience, Institute of Molecular Biosciences, Mahidol University,  
Salaya campus, Nakhon Pathom 73170, Thailand

\* Corresponding authors:

Sukonthar Ngampramuan: [sukonthar.nga@mahidol.ac.th](mailto:sukonthar.nga@mahidol.ac.th), Tel: +66-81-954-2959

Naiphinich Kotchabhakdi: [naiphinich@gmail.com](mailto:naiphinich@gmail.com), Tel: +66-81-483-6066

<http://dx.doi.org/10.17179/excli2016-482>

This is an Open Access article distributed under the terms of the Creative Commons Attribution License  
(<http://creativecommons.org/licenses/by/4.0/>).

**Abbreviations in the experiment:** preS: pre-surgery, postS: post-surgery, sham: sham-operated group, KA: kainic acid/non-treated group, KA+TGB: kainic acid tiagabine treated group, TGB: tiagabine group, BW: beam walking, EMG: electromyography, DV: dorsal-ventral coordinates, i.p.: intraperitoneal injection.

## Supplemental information: raw data

### S1. Dystonic behavioral scores for individual animal at 120 minutes post-surgery (Figure 3)

**A**

| Gr./No.         | Time (mins) |      |     |      |      |      |      |      |      |      |      |      |
|-----------------|-------------|------|-----|------|------|------|------|------|------|------|------|------|
| <b>Sham</b>     | 10          | 20   | 30  | 40   | 50   | 60   | 70   | 80   | 90   | 100  | 110  | 120  |
| 1502            | 1           | 1    | 1   | 1    | 1    | 1    | 1    | 1    | 1    | 1    | 1    | 1    |
| 1504            | 0           | 1    | 1   | 1    | 1    | 1    | 1    | 0    | 0    | 0    | 0    | 0    |
| 1507            | 0           | 0    | 0   | 0    | 1    | 1    | 1    | 1    | 1    | 0    | 0    | 0    |
| 1512            | 2           | 2    | 2   | 1    | 2    | 2    | 2    | 1    | 1    | 1    | 1    | 1    |
| Average         | 0.75        | 1    | 1   | 0.75 | 1.25 | 1.25 | 1.25 | 0.75 | 0.75 | 0.5  | 0.5  | 0.5  |
| <b>KA</b>       |             |      |     |      |      |      |      |      |      |      |      |      |
| 1402            | 6           | 6    | 6   | 5    | 5    | 6    | 6    | 6    | 6    | 4    | 4    | 3    |
| 1409            | 5           | 5    | 6   | 5    | 5    | 5    | 6    | 6    | 5    | 4    | 4    | 4    |
| 1410            | 5           | 5    | 4   | 6    | 6    | 6    | 6    | 6    | 6    | 6    | 6    | 6    |
| 1412            | 6           | 5    | 6   | 5    | 5    | 4    | 6    | 6    | 5    | 5    | 5    | 6    |
| Average         | 5.5         | 5.25 | 5.5 | 5.25 | 5.25 | 5.25 | 6    | 6    | 5.5  | 4.75 | 4.75 | 4.75 |
| <b>KA + TGB</b> |             |      |     |      |      |      |      |      |      |      |      |      |
| 1406            | 5           | 5    | 6   | 6    | 5    | 5    | 6    | 6    | 5    | 4    | 6    | 5    |
| 1408            | 5           | 4    | 4   | 6    | 4    | 6    | 5    | 5    | 5    | 6    | 5    | 6    |
| 1505            | 4           | 2    | 3   | 2    | 3    | 3    | 4    | 4    | 6    | 6    | 5    | 5    |
| 1508            | 4           | 4    | 5   | 4    | 3    | 5    | 6    | 6    | 5    | 4    | 5    | 6    |
| Average         | 4.5         | 3.75 | 4.5 | 4.5  | 3.75 | 4.75 | 5.25 | 5.25 | 5.25 | 5    | 5.25 | 5.5  |

**B**

| Gr./No.         | Time (mins) |      |     |      |      |      |      |      |      |      |      |      |
|-----------------|-------------|------|-----|------|------|------|------|------|------|------|------|------|
| <b>Sham</b>     | 0.75        | 1    | 1   | 0.75 | 1.25 | 1.25 | 1.25 | 0.75 | 0.75 | 0.5  | 0.5  | 0.5  |
| <b>KA</b>       | 5.5         | 5.25 | 5.5 | 5.25 | 5.25 | 5.25 | 6    | 6    | 5.5  | 4.75 | 4.75 | 4.75 |
| <b>KA + TGB</b> | 4.5         | 3.75 | 4.5 | 4.5  | 3.75 | 4.75 | 5.25 | 5.25 | 5.25 | 5    | 5.25 | 5.5  |

**S1-Table 1:** The dystonic scores from individual rats were obtained from dystonic behavioral scoring Table (Table 1 in the text). **(A)** Each group of rats was allotted a score every 10 minutes for 2 hours (10 to 120) in duration. The 4 digit numbers are the rat code numbers in each group. The average score for each group was calculated every 10 minutes after the scores were given, which has been highlighted with yellow for the sham-operated group, blue for the kainic acid group and pink for the kainic acid treatment group. **(B)** The different colors representing the average for each group was then used to plot a graph, Figure 3. Gr., group; No., rat code number; mins, minutes; Sham, sham-operated; KA, kainic acid; KA+TGB, kainic acid with tiagabine treatment.

**S2. Intra-muscular EMG amplitude data (Figure 4)**

**A**

|                | No.  | preS   | postS  | 90m    | 7h     | 22h   | 30h    | 48h    |
|----------------|------|--------|--------|--------|--------|-------|--------|--------|
| <b>Sham</b>    | 1502 | 21.59  | 24.73  | 20.14  | 13.16  | 13.92 | 14.66  | 14.51  |
|                | 1504 | 12.23  | 25.84  | 17.84  | 13.16  | 13.92 | 14.66  | 14.51  |
|                | 1507 | 13.77  | 11.38  | 15.45  | 13.16  | 13.92 | 14.66  | 14.51  |
|                | 1512 | 9.85   | 17.25  | 15.92  | 13.16  | 13.92 | 14.66  | 14.51  |
| <b>Average</b> |      | 14.364 | 19.804 | 17.341 | 13.164 | 13.92 | 14.668 | 14.519 |
| <b>SD</b>      |      | 5.082  | 6.788  | 2.132  | 0      | 0     | 0      | 0      |

|                | No.  | preS   | postS  | 90m    | 7h     | 22h    | 30h    | 48h    |
|----------------|------|--------|--------|--------|--------|--------|--------|--------|
| <b>KA</b>      | 1402 | 14.88  | 29.93  | 28.03  | 30.44  | 40.73  | 49.94  | 47.54  |
|                | 1409 | 13.14  | 36.11  | 39.72  | 27.62  | 38.97  | 43.75  | 46.98  |
|                | 1410 | 11.44  | 48.57  | 12.80  | 34.37  | 49.87  | 48.63  | 55.78  |
|                | 1412 | 19.66  | 54.16  | 29.30  | 47.78  | 49.72  | 57.89  | 40.36  |
| <b>Average</b> |      | 14.784 | 42.199 | 27.468 | 35.056 | 44.829 | 50.056 | 47.671 |
| <b>SD</b>      |      | 3.545  | 11.122 | 11.091 | 8.924  | 5.785  | 5.862  | 6.315  |

|                | No.  | preS   | postS  | 90m    | 7h     | 22h    | 30h    | 48h    |
|----------------|------|--------|--------|--------|--------|--------|--------|--------|
| <b>KA+TGB</b>  | 1406 | 18.21  | 26.16  | 20.68  | 21.74  | 27.47  | 28.68  | 27.93  |
|                | 1408 | 14.25  | 21.54  | 20.25  | 17.79  | 31.02  | 35.34  | 29.11  |
|                | 1505 | 15.18  | 16.84  | 31.53  | 23.06  | 24.08  | 31.15  | 26.78  |
|                | 1508 | 13.88  | 18.68  | 26.45  | 27.21  | 22.32  | 28.76  | 22.18  |
| <b>Average</b> |      | 15.385 | 20.809 | 24.732 | 22.456 | 26.229 | 30.897 | 26.501 |
| <b>SD</b>      |      | 1.965  | 4.058  | 5.341  | 3.885  | 3.844  | 3.123  | 3.033  |

|                | No.  | preS   | postS  | 90m    | 7h     | 22h    | 30h    | 48h    |
|----------------|------|--------|--------|--------|--------|--------|--------|--------|
| <b>TGB</b>     | 1404 | 11.07  | 13.44  | 19.08  | 25.60  | 20.19  | 20.76  | 22.11  |
|                | 1503 | 13.15  | 13.44  | 13.44  | 21.57  | 15.28  | 15.70  | 22.33  |
|                | 1509 | 13.45  | 13.44  | 17.74  | 20.60  | 23.28  | 21.22  | 28.07  |
|                | 1511 | 12.00  | 13.44  | 19.01  | 17.06  | 22.42  | 17.20  | 19.37  |
| <b>Average</b> |      | 12.424 | 13.442 | 17.320 | 20.213 | 20.295 | 18.724 | 22.975 |
| <b>SD</b>      |      | 1.094  | 0      | 2.657  | 3.511  | 3.586  | 2.698  | 3.657  |

**B**

| Gr.           | preS   | postS  | 90m    | 7h     | 22h    | 30h    | 48h    |
|---------------|--------|--------|--------|--------|--------|--------|--------|
| <b>Sham</b>   | 14.364 | 19.804 | 17.341 | 13.164 | 13.92  | 14.668 | 14.519 |
| SD            | 5.082  | 6.788  | 2.132  | 0      | 0      | 0      | 0      |
| <b>KA</b>     | 14.784 | 42.199 | 27.468 | 35.056 | 44.829 | 50.056 | 47.671 |
| SD            | 3.545  | 11.122 | 11.091 | 8.924  | 5.785  | 5.862  | 6.315  |
| <b>KA+TGB</b> | 15.385 | 20.809 | 24.732 | 22.456 | 26.229 | 30.897 | 26.501 |
| SD            | 1.965  | 4.058  | 5.341  | 3.885  | 3.844  | 3.123  | 3.033  |
| <b>TGB</b>    | 12.424 | 13.442 | 17.320 | 20.213 | 20.295 | 18.724 | 22.975 |
| SD            | 1.094  | 0      | 2.657  | 3.511  | 3.586  | 2.698  | 3.657  |

**S2-Table 1:** The EMG data presented in this Table was summarized and averaged from the primary EMG amplitude in Chart 5.4. **(A)** The 4 digit numbers are the rat code numbers in each group. The amplitude of each duration, including the pre-surgery, post-surgery and hours after surgery were recorded from individual rats in each group. The average of each duration was calculated and highlighted in color; orange for the sham group, light green for the kainic acid group, pink for the kainic acid treatment group and blue for the tiagabine only group, with yellow as the standard deviation for each group. **(B)** The graph (Figure 4) was plotted using the average from each group. Gr., group; No., rat code number; Sham, sham-operated; KA, kainic acid; KA+TGB, kainic acid with tiagabine treatment; TGB, tiagabine only; preS, pre-surgery; postS, post-surgery; m, minutes; h, hour; SD, standard deviation.

### S3. Beam walking analysis

#### S3-1. Beam walking behavior observation: scores (Figure 5)

**A.**

| Gr/ No.         |             |              |    |    |    |    | Average |
|-----------------|-------------|--------------|----|----|----|----|---------|
| <b>Sham</b>     | <b>preS</b> | <b>postS</b> |    |    |    |    |         |
| 1502            | 10          | 10           | 10 | 10 | 10 | 10 | 10      |
| 1504            | 10          | 10           | 10 | 10 | 10 | 10 | 10      |
| 1507            | 10          | 10           | 10 | 10 | 10 | 10 | 10      |
| 1512            | 10          | 10           | 10 | 10 | 10 | 10 | 10      |
|                 |             |              |    |    |    |    | 10      |
| <b>KA</b>       |             |              |    |    |    |    |         |
| 1402            | 10          | 0            | 0  | 0  | 0  | 0  | 0       |
| 1409            | 10          | 2            | 2  | 2  | 3  | 6  | 3       |
| 1410            | 10          | 2            | 2  | 3  | 3  | 6  | 3.2     |
| 1412            | 10          | 0            | 0  | 0  | 0  | 0  | 0       |
|                 |             |              |    |    |    |    | 1.57    |
| <b>KA + TGB</b> |             |              |    |    |    |    |         |
| 1406            | 10          | 3            | 4  | 6  | 5  | 6  | 4.8     |
| 1408            | 10          | 5            | 4  | 4  | 4  | 6  | 4.6     |
| 1505            | 10          | 5            | 6  | 6  | 6  | 6  | 5.8     |
| 1508            | 10          | 6            | 6  | 8  | 8  | 8  | 7.2     |
|                 |             |              |    |    |    |    | 6       |
| <b>TGB</b>      |             |              |    |    |    |    |         |
| 1404            | 10          | 4            | 5  | 6  | 6  | 6  | 5.4     |
| 1503            | 10          | 10           | 9  | 10 | 8  | 9  | 9.2     |
| 1509            | 10          | 9            | 9  | 9  | 9  | 8  | 8.8     |
| 1511            | 10          | 9            | 10 | 10 | 10 | 10 | 9.8     |
|                 |             |              |    |    |    |    | 8       |

**B.**

|               | preS | postS |
|---------------|------|-------|
| <b>Sham</b>   | 10   | 10    |
| <b>KA</b>     | 10   | 1.57  |
| <b>KA+TGB</b> | 10   | 6     |
| <b>TGB</b>    | 10   | 8     |

**S3-Table 1:** The behavioral scores were obtained in accordance with Table 2 from the text. **(A)** After being given the scores by a third person, before and after the surgery, the numbers were averaged from individual rats each group. **(B)** The average from each rat was calculated again and the final number (pink) from each group was used to plot a graph, Figure 5 from the text. The 4 digit numbers are the rat code numbers in each group. Gr., group; No., rat code number; Sham, sham-operated; KA, kainic acid; KA+TGB, kainic acid with tiagabine treatment; TGB, tiagabine only; preS, pre-surgery; postS, post-surgery.

**S3-2. Pre-surgery (training/habituation) and post-surgery: average time in crossing the bridge for individual rat. Time in seconds (Figure 6A)**

**A1.**

| Gr./No.         | Pre-surgery |       |       |       |       |           |       |       |       |       |         |
|-----------------|-------------|-------|-------|-------|-------|-----------|-------|-------|-------|-------|---------|
| Sham            | Session 1   |       |       |       |       | Session 2 |       |       |       |       | Average |
| 1502            | 11.97       | 13.54 | 11.86 | 9.18  | 12.59 | 9         | 13.68 | 14.7  | 16.06 | 16.01 | 12.85   |
| 1504            | 8.61        | 7.07  | 9.59  | 6.86  | 6.92  | 12.71     | 8.37  | 13.42 | 6.26  | 17.35 | 9.716   |
| 1507            | 7.65        | 5.32  | 14.36 | 13.53 | 15.41 | 16.71     | 9.01  | 6.42  | 5.45  | 9.14  | 10.3    |
| 1512            | 13.26       | 9.51  | 10.21 | 11.42 | 10.74 | 14.75     | 12.25 | 9.04  | 7     | 10.91 | 10.90   |
|                 |             |       |       |       |       |           |       |       |       |       | 10.95   |
| <b>KA</b>       |             |       |       |       |       |           |       |       |       |       |         |
| 1402            | 3.85        | 6.67  | 4.36  | 10.96 | 12.54 | 7.44      | 5.57  | 12.31 | 7.96  | 10.15 | 8.18    |
| 1409            | 11.38       | 9.69  | 17.64 | 16.17 | 8.4   | 5.37      | 16.14 | 3.73  | 3.78  | 4.82  | 9.71    |
| 1410            | 19.62       | 12.18 | 9.24  | 18    | 14.42 | 9.58      | 5.59  | 6.78  | 4.25  | 9.76  | 10.94   |
| 1412            | 7.93        | 5.3   | 6.12  | 8.7   | 10.9  | 7.6       | 8.75  | 6.88  | 12.76 | 18.13 | 9.30    |
|                 |             |       |       |       |       |           |       |       |       |       | 9.53    |
| <b>KA + TGB</b> |             |       |       |       |       |           |       |       |       |       |         |
| 1406            | 15.57       | 9.27  | 12.22 | 10.05 | 10.23 | 8.21      | 13.71 | 11.79 | 7.24  | 14.04 | 11.23   |
| 1408            | 5.54        | 8.75  | 8.87  | 6.66  | 6.22  | 10.29     | 5.39  | 6.53  | 11.21 | 13.22 | 8.26    |
| 1505            | 9.74        | 8.04  | 7.78  | 9.45  | 12.4  | 7.95      | 10.22 | 17.31 | 11.98 | 13.27 | 10.81   |
| 1508            | 12.16       | 15    | 12.12 | 6.14  | 9.37  | 15.13     | 13.12 | 12.95 | 10.45 | 19    | 12.54   |
|                 |             |       |       |       |       |           |       |       |       |       | 10.71   |
| <b>TGB</b>      |             |       |       |       |       |           |       |       |       |       |         |
| 1404            | 16.15       | 13.17 | 12.45 | 12.16 | 9.97  | 8.72      | 9.72  | 5.73  | 7.89  | 6.29  | 10.22   |
| 1503            | 6.86        | 6.45  | 5.78  | 8.87  | 7.33  | 10.04     | 11.12 | 6.45  | 11.13 | 5.3   | 7.93    |
| 1509            | 8.87        | 9.35  | 10.1  | 8.87  | 9.01  | 6.19      | 8.61  | 9.39  | 11.33 | 11.67 | 9.33    |
| 1511            | 9.89        | 8.36  | 9.98  | 9.88  | 9.53  | 8.8       | 13.96 | 11.47 | 7.73  | 7.39  | 9.69    |
|                 |             |       |       |       |       |           |       |       |       |       | 9.29    |

A2.

| Gr./ No.        | Post-surgery |       |       |         |
|-----------------|--------------|-------|-------|---------|
| <b>Sham</b>     |              |       |       | Average |
| 1502            | 14.13        | 10.12 | 14.48 | 12.91   |
| 1504            | 8.02         | 18.62 | 12.29 | 12.97   |
| 1507            | 9.55         | 17.45 | 15.67 | 14.22   |
| 1512            | 13.34        | 11.22 | 10.91 | 11.82   |
|                 |              |       |       | 12.98   |
| <b>KA</b>       |              |       |       |         |
| 1402            | 60           | 60    | 60    | 60      |
| 1409            | 7.15         | 16.01 | 50.96 | 24.7    |
| 1410            | 20.71        | 60    | 22.65 | 34.45   |
| 1412            | 60           | 60    | 60    | 60      |
|                 |              |       |       | 44.78   |
| <b>KA + TGB</b> |              |       |       |         |
| 1406            | 14.88        | 21.29 | 60    | 32.05   |
| 1408            | 12.54        | 30.53 | 20.2  | 21.09   |
| 1505            | 60           | 18.79 | 22.48 | 33.75   |
| 1508            | 11.93        | 14.62 | 16.64 | 14.39   |
|                 |              |       |       | 25.32   |
| <b>TGB</b>      |              |       |       |         |
| 1404            | 21.2         | 10    | 21.12 | 17.44   |
| 1503            | 15.55        | 15.78 | 13.47 | 14.93   |
| 1509            | 16.16        | 20.2  | 33.02 | 23.12   |
| 1511            | 14.66        | 9.56  | 14.35 | 12.85   |
|                 |              |       |       | 17.08   |

B.

|               | preS  | postS |
|---------------|-------|-------|
| <b>Sham</b>   | 10.95 | 12.98 |
| <b>KA</b>     | 9.53  | 44.78 |
| <b>KA+TGB</b> | 10.71 | 25.32 |
| <b>TGB</b>    | 9.29  | 17.08 |

**S3-Table 2:** As mentioned in the main text, individual rat was trained for two sessions before the surgery. **(A1)** The pre-surgery data was obtained during the two sessions and averaged from individual rats in each group and highlighted according to the group; yellow for the sham group, orange for the kainic acid group, green for the kainic acid treatment group and blue for the tiagabine only group, with further averaging highlighted in pink. **(A2)** The record for the 3<sup>rd</sup> beam walking task was also calculated from individual rats after the surgery, with the average highlighted in light green for the sham group, grey for the kainic acid group, green for the kainic acid treatment group and purple for the tiagabine group. **(B)** Pre-surgery and post-surgery data were compared and plotted into a graph as Figure 6A. The 4 digit numbers are the rat code numbers in each group. Gr., group; No., rat code number; Sham, sham-operated; KA, kainic acid; KA+TGB, kainic acid with tiagabine treatment; TGB, tiagabine only; preS, pre-surgery; postS, post-surgery.

**S3-3. Post-surgery: distance crossed (cm) (Figure 6B)**

| Gr/ No.         | postS |     |     | Average |
|-----------------|-------|-----|-----|---------|
| <b>Sham</b>     |       |     |     |         |
| 1502            | 110   | 110 | 110 | 110     |
| 1504            | 110   | 110 | 110 | 110     |
| 1507            | 110   | 110 | 110 | 110     |
| 1512            | 110   | 110 | 110 | 110     |
|                 |       |     |     | 110     |
| <b>KA</b>       |       |     |     |         |
| 1402            | 0     | 0   | 0   | 0       |
| 1409            | 30    | 110 | 110 | 83.33   |
| 1410            | 80    | 0   | 110 | 63.33   |
| 1412            | 0     | 0   | 0   | 0       |
|                 |       |     |     | 36.5    |
| <b>KA + TGB</b> |       |     |     |         |
| 1406            | 60    | 60  | 0   | 40      |
| 1408            | 50    | 110 | 110 | 90      |
| 1505            | 0     | 90  | 40  | 43.33   |
| 1508            | 110   | 110 | 110 | 110     |
|                 |       |     |     | 70      |
| <b>TGB</b>      |       |     |     |         |
| 1404            | 70    | 70  | 70  | 70      |
| 1503            | 110   | 110 | 110 | 110     |
| 1509            | 110   | 110 | 110 | 110     |
| 1511            | 110   | 110 | 110 | 110     |
|                 |       |     |     | 100     |

**S3-Table 3:** The distance in crossing the beam was measured in the beam walking task after the surgery. Data from each rat was calculated (blue) and the final number for each group (green) was used to plot a graph, as Figure 6B in the text. The total length of the beam was 110 cm. The 4 digit numbers are the rat code numbers in each group. Gr., group; No., rat code number; Sham, sham-operated; KA, kainic acid; KA+TGB, kainic acid with tiagabine treatment; TGB, tiagabine only; postS, post-surgery.
